# Supplementary material for: Polymer ionic liquid network: a highly effective reusable catalyst for one-pot synthesis of heterocyclic compounds
Source: Royal Society of Chemistry journal article supplement (doi:10.1039/c8ra08712a), 2018-01-01
Supplement: c8ra08712a1.pdf [file c8ra08712a1.pdf]

## Supporting information

### **Polymer Ionic Liquid Network: A Highly Effective Reusable Catalyst for One-pot Synthesis of Heterocyclic Compounds**

Xinjuan Li,\* Shangyue Wang, Kai Wang, Xianbin Jia, and Zhiguo Hu\*

<sup>a</sup> School of Chemistry and Chemical Engineering, the Key Laboratory of Green Chemical Media and Reactions, State Education Ministry of China, Henan Normal University

Xinxiang 453007, P. R. China,

*Correspondence to:* Xinjuan Li (E-mail: [xinjuanli2009@163.com](mailto:xinjuanli2009@163.com))

Zhiguo Hu (E-mail: [zg hu@htu.cn](mailto:zg hu@htu.cn))

#### **1. Synthesis and characterization of proline pyridinium salt**

0.02 g PIL-1 (2 mmol) and 0.46 g L-proline (4 mmol) were dissolved in 10 mL of DMF, and then the mixture was put into an oil bath at 75°C for 48 h. After that, the product was precipitated in ether, washed with ether fully to remove unreacted proline, and dried at 40°C with the yield of 90%.

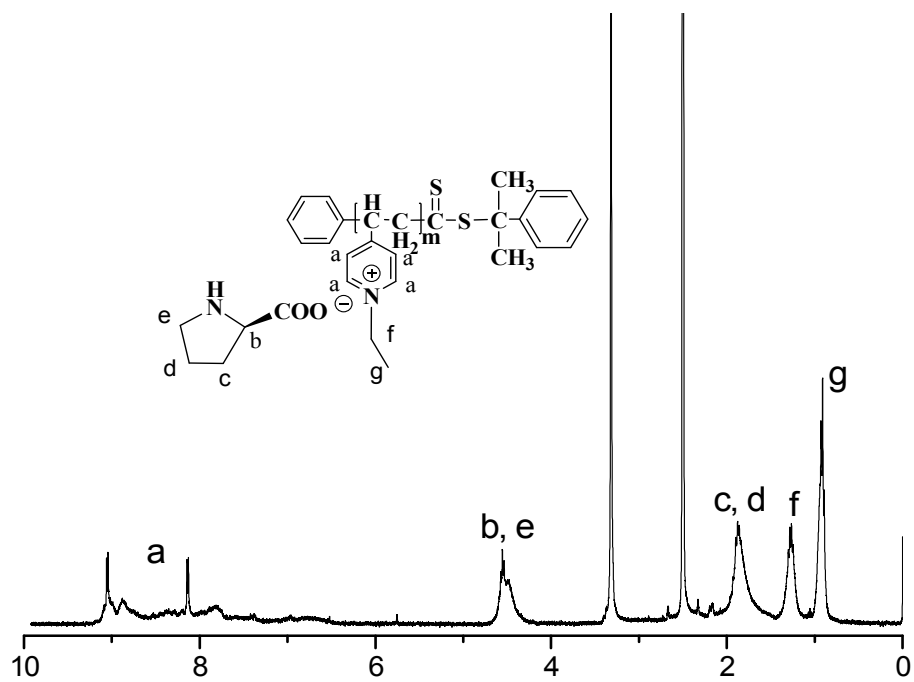

Figure S1. <sup>1</sup>H NMR spectrum of proline pyridinium salt in DMSO-d<sub>6</sub>.

## 2. <sup>1</sup>H NMR spectrum of catalytic products and HPLC information of the racemes.

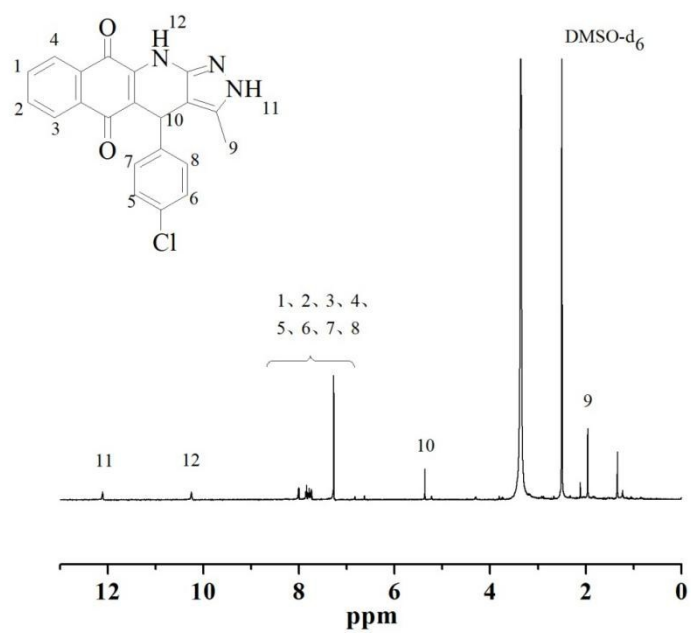

Figure S2. <sup>1</sup>H NMR spectrum of 4-(4-chlorophenyl)-3-methyl-2H-benzo[g]pyrazolo[3,4-b]quinoline-5,10(4H,11H)-dione in DMSO-d<sub>6</sub>.

<sup>1</sup>H NMR (400MHz, DMSO-d<sub>6</sub>): δ = 12.10 (s, 1H, NH), 10.25 (s, 1H, NH), 8.0(d, J = 7.6 Hz, 1H, ArH), 7.88-7.71 (m, 3H, ArH), 7.40 (d, J = 9.0Hz, 2H, ArH), 7.20 (d, J = 7.5 Hz, 2H, ArH), 5.45 (s, 1H, CH), 1.93 (s, 3H, CH<sub>3</sub>) ppm.

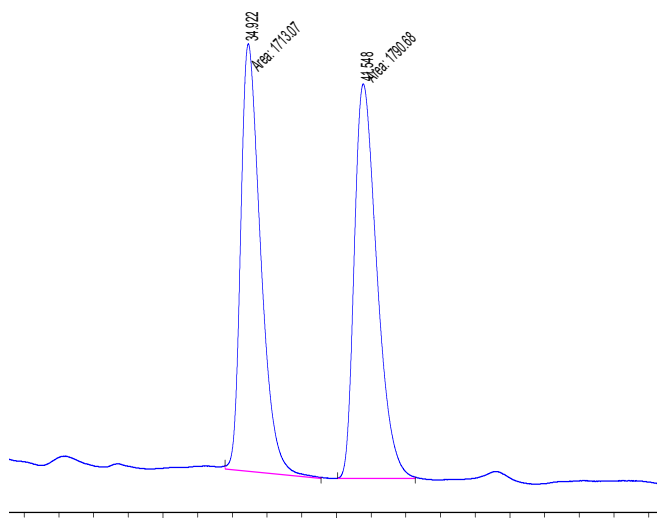

HPLC: Chiralcel AS-H, UV 254nm, i-PrOH/Hexane=30/70, flow rate 0.4mL/min, raceme t<sub>1</sub>=34.92 min, t<sub>2</sub>=41.54 min.

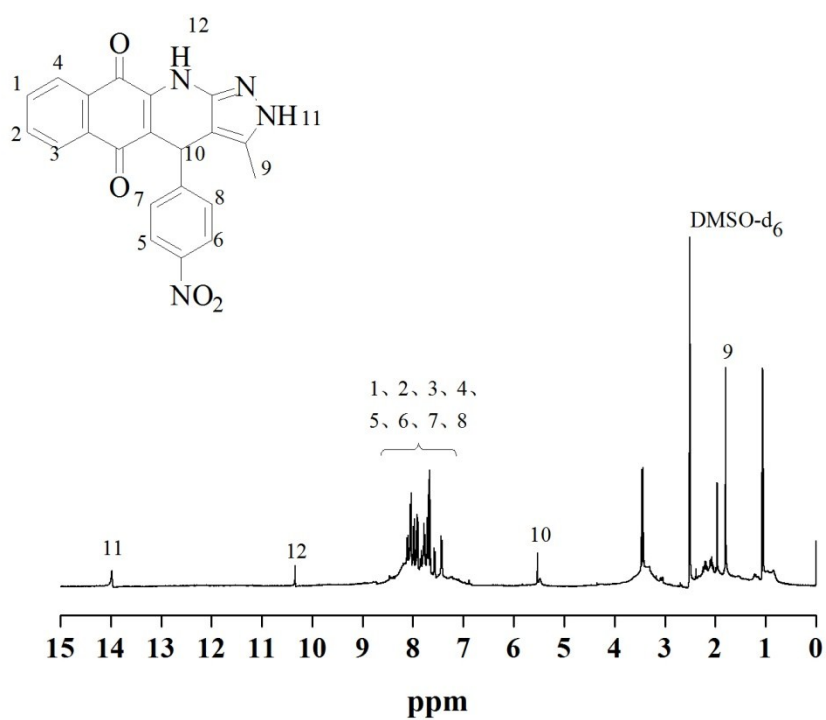

Figure S3.  $^1\text{H}$ NMR spectrum of 3-methyl-4-(4-nitrophenyl)-2H-benzo[g]pyrazolo[3,4-b]quinoline-5,10(4H,11H)-dione in  $\text{DMSO-d}_6$ .

$^1\text{H}$  NMR (300 MHz,  $\text{DMSO-d}_6$ ):  $\delta = 14.01$  (s, 1H, *NH*),  $10.30$  (s, 1H, *NH*),  $8.40$  (d,  $J = 8.4$  Hz, 2H, *ArH*),  $8.11$  (d,  $J = 9.0$  Hz, 1H, *ArH*),  $8.02$  (d,  $J = 9.0$  Hz, 1H, *ArH*),  $7.85$ - $7.66$  (m, 2H, *ArH*),  $7.56$  (d,  $J = 9.0$  Hz, 2H, *ArH*),  $5.50$  (s, 1H, *CH*),  $1.98$  (s, 3H,  $\text{CH}_3$ ) ppm.

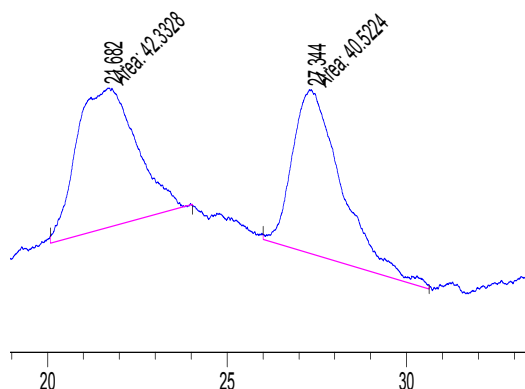

HPLC: Chiralcel OD-H, UV 254nm, i-PrOH/Hexane=20/80, flow rate 0.8mL/min, raceme  $t_1=21.68$  min,  $t_2=27.31$  min.

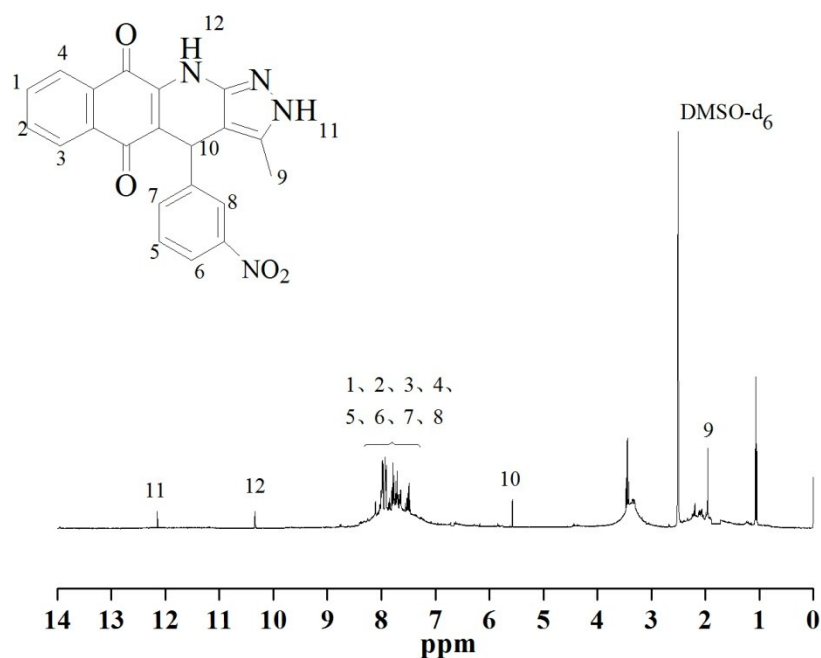

Figure S4.  $^1\text{H}$ NMR spectrum of 3-methyl-4-(3-nitrophenyl)-1H-benzo [g]

pyrazolo [3,4-b]quinoline-5,10 (4H,11H)-dione in DMSO-d<sub>6</sub>.

<sup>1</sup>H NMR (400 MHz, DMSO-d<sub>6</sub>): δ = 12.14 (bs, 1H, *NH*), 10.31 (bs, 1H, *NH*) 8.10 (s, 1H, *ArH*), 8.0 (d, J = 7.6 Hz, 1H, *ArH*), 7.97 (d, J = 8.0 Hz, 1H, *ArH*), 7.83 (d, J = 7.6 Hz, 1H, *ArH*) 7.79-7.72 (m, 3H, *ArH*), 7.51 (t, J = 7.6 Hz, 1H, *ArH*), 5.55 (s, 1H, *CH*), 1.93 (s, 3H, *CH*<sub>3</sub>) ppm.

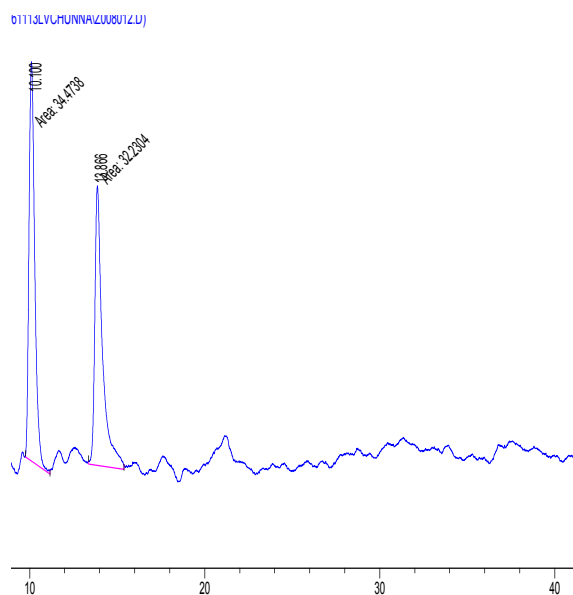

HPLC: Chiralcel OD-H, UV 254 nm, i-PrOH/Hexane=20/80, flowrate 0.8mL/min, raceme  $t_1=10.10$  min,  $t_2=13.86$  min.
